# Supplementary material
Source: PubMed Central journal article supplement (PMC6985753)

A Translational Approach to Predicting the Efficacy of Maraviroc-based Regimens as HIV Pre-exposure Prophylaxis

*Supplementary material*

Nithya Srinivas<sup>a\*</sup>, Mackenzie Cottrell<sup>a</sup>, Kaitlyn Maffuid<sup>a</sup>, Heather A Prince<sup>b</sup>, Julie AE Nelson<sup>c</sup>, Nicole White<sup>a</sup>, Craig Sykes<sup>a</sup>, Evan S Dellon<sup>b</sup>, Ryan D Madanick<sup>b</sup>, Nicholas J Shaheen<sup>b</sup>, Daniel Gonzalez<sup>a</sup> & Angela DM Kashuba<sup>a,b</sup>

<sup>a</sup>*Division of Pharmacotherapy and Experimental Therapeutics, UNC Eshelman School of Pharmacy, University of North Carolina, Chapel Hill,* <sup>b</sup>*Division of Gastroenterology and Hepatology, School of Medicine, University of North Carolina, Chapel Hill,* <sup>c</sup>*Virology, Immunology and Microbiology Core, UNC Center for AIDS Research, University of North Carolina, Chapel Hill*

\* *Current affiliation: Incyte Corporation, Wilmington, Delaware*

**Running Title:** Maraviroc Pop-PK Model for PrEP efficacy

**Corresponding Author Contact Information:**

Angela D. M. Kashuba, PharmD  
1094 Genetic Medicine Building, CB# 7361  
120 Mason Farm Road  
UNC Eshelman School of Pharmacy  
Division of Pharmacotherapy and Experimental Therapeutics  
University of North Carolina at Chapel Hill, North Carolina, NC 27599  
Tel (919) 966-9998 Fax (919) 962-0644  
[akashuba@unc.edu](mailto:akashuba@unc.edu)

## Supplementary Material

### **Determination of protein binding in the female genital tract and rectal tissue of adult rhesus macaques:**

Protein binding of Maraviroc (MVC) was determined in female genital tract and rectal tissues of six adult rhesus macaques by homogenizing individual tissue samples using 1 mL of 0.9% NaCl. Following homogenization, a Thermo scientific rapid equilibrium dialysis (RED) system, utilizing 300 $\mu$ L of homogenate sample and 500  $\mu$ L of 0.01M HCL (buffer), was used. After a 16-hour incubation in the RED system (Thermomixer plate 37°C at 300rpm), a volume of tissue homogenate sample (red well) and buffer sample (white well) were extracted by protein precipitation with a stable-labelled internal standard (IS) for MVC (MVC-d6).

Chromatographic separation of was achieved using reverse-phase chromatography on a Waters Xterra MS C18 (50 x 2.1mm, 3.5 $\mu$ m) analytical column. With detection on an AB Sciex API-5000 triple quadrupole mass spectrometer using electrospray ionization in the positive ion mode.

Data were collected using the Sciex Analyst Software. MVC was quantified against its internal standard using a linear regression algorithm with 1/x<sup>2</sup> weighting.

**Supplementary Table 1: Table of PK parameters for the final maraviroc population PK model**

| <b>Parameter</b>                            | <b>Value</b>  | <b>Inter-individual Variability (CV%)</b> | <b>Relative Standard Error (%)</b> |
|---------------------------------------------|---------------|-------------------------------------------|------------------------------------|
| Ka (1/hr)                                   | 0.216         | -                                         | 10                                 |
| V2 (L)                                      | 217           | 108%                                      | 34                                 |
| V3 (L)                                      | 792           | -                                         | 30                                 |
| Cl <sub>t</sub> (L/hr)                      | 189           | 36%                                       | 17                                 |
| Cl <sub>23</sub> (L/hr)                     | 20            | -                                         | 29                                 |
| V4 (L)                                      | 0.1<br>FIXED  | -                                         | -                                  |
| Cl <sub>24</sub> (L/hr)                     | 0.027         | -                                         | 35                                 |
| Cl <sub>fgt</sub> (L/hr)                    | 0.01          | -                                         | 19                                 |
| K <sub>g</sub> (1/hr)                       | 0.036         | 37%                                       | 21                                 |
| V5 (L)                                      | 0.17<br>FIXED | -                                         | -                                  |
| Cl <sub>25</sub> (L/hr)                     | 0.94          | -                                         | 26                                 |
| Cl <sub>r</sub> (L/hr)                      | 0.08          | -                                         | 21                                 |
| Residual variability in plasma = 77%        |               |                                           |                                    |
| Residual variability in FGT = 45%           |               |                                           |                                    |
| Residual variability in rectal tissue = 17% |               |                                           |                                    |

PK parameters are reported for the final population PK model

**Supplementary Figure 1: Boxplots for the maraviroc concentrations in the vaginal tissue and cervical tissue at various dose levels.** Wilcoxon signed rank test indicated that there was no statistically significant difference ( $p=0.07$ ) between the vaginal and cervical tissue concentrations.

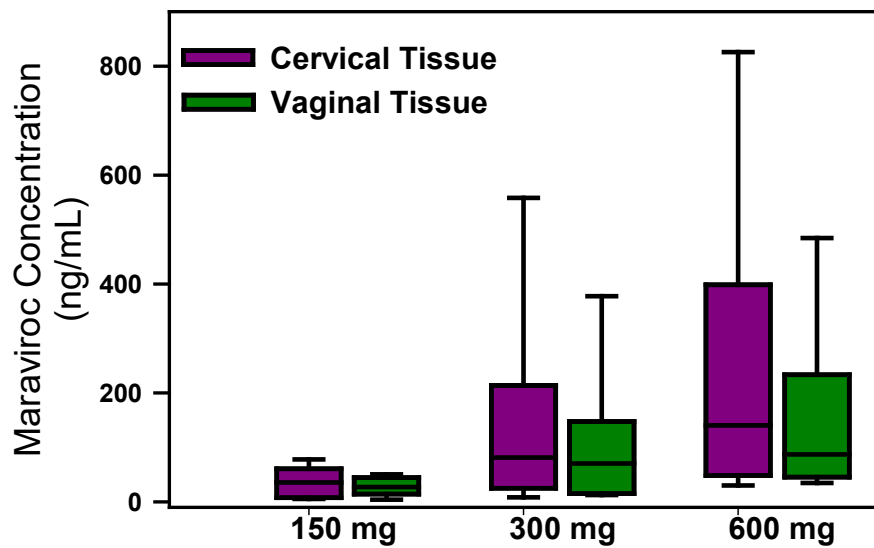

**Supplementary Figure 2: Diagnostic plots for the maraviroc population pharmacokinetic model.** Individual prediction versus observation plots are shown for the (a) plasma, (d) female-genital tract and (g) rectal tissue compartments. Conditional-weighted residual plot versus the time after last dose are shown for the (b) plasma, (e) female-genital tract and (h) rectal tissue compartments and visual predictive checks are shown as an overlay of maraviroc concentrations over the 5<sup>th</sup>, 25<sup>th</sup>, median, 75<sup>th</sup> and 95<sup>th</sup> percentiles of the model concentration predictions for the (c) plasma, (f) female-genital tract and (i) rectal tissue compartments. All diagnostic plots indicated that the model fit the data reasonably well.

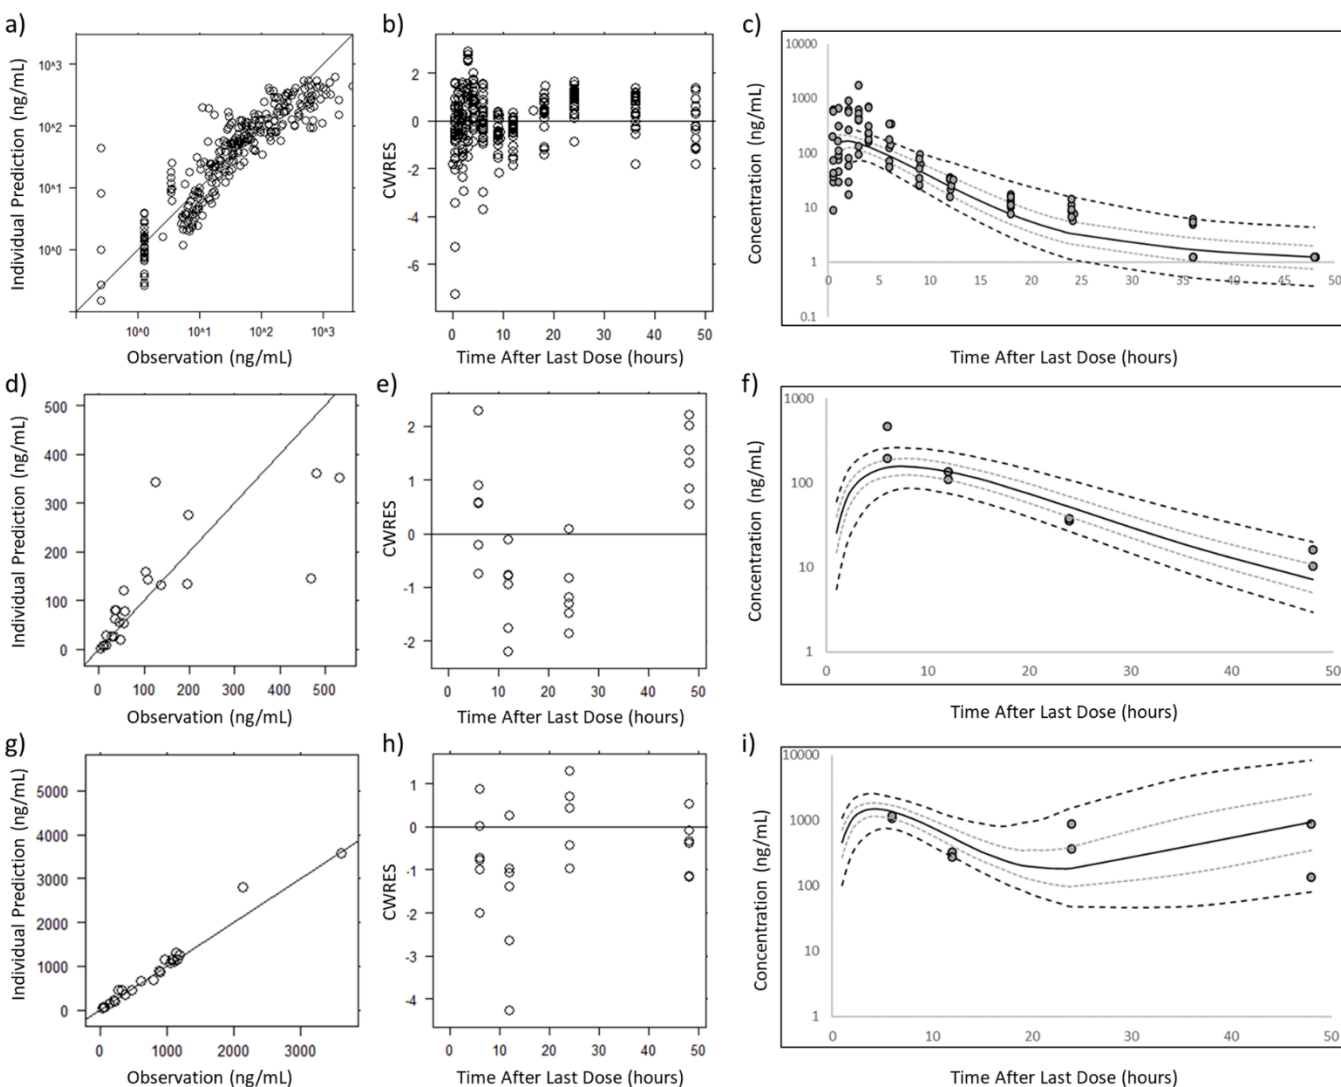

Supplement: AAC.01729-19-s0001.pdf [file AAC.01729-19-s0001.pdf]
